# Supplementary material for: Temperature-Arousing Self-Powered Fire Warning E-Textile Based on p–n Segment Coaxial Aerogel Fibers for Active Fire Protection in Firefighting Clothing
Source: PubMed Central journal article supplement (PMC10575845; doi:10.1007/s40820-023-01200-8), 2023-10-13
Supplement: 40820_2023_1200_MOESM1_ESM.pdf [file 40820_2023_1200_MOESM1_ESM.pdf]

Supporting Information for

# **Temperature Arousing Self-Powered Fire Warning e-Textile Based on p-n Segmented Coaxial Aerogel Fibers for Active Fire Protection in Firefighting Clothing**

Hualing He<sup>1,2, #</sup>, Yi Qin<sup>1, #</sup>, Zhenyu Zhu<sup>1</sup>, Qing Jiang<sup>1</sup>, Shengnan Ouyang<sup>2</sup>, Yuhang Wan<sup>1</sup>, Xueru Qu<sup>1</sup>, Jie Xu<sup>1</sup>, and Zhicai Yu<sup>1, 2, 3, \*</sup>

<sup>1</sup> State Key Laboratory of New Textile Materials and Advanced Processing Technologies, School of Textile Science and Engineering, Wuhan Textile University, Wuhan 430200, People's Republic of China

<sup>2</sup> National Local Joint Laboratory for Advanced Textile Processing and Clean Production, Hubei Key Laboratory of Biomass Fibers and Eco-dyeing & Finishing, Wuhan Textile University, Wuhan 430200, People's Republic of China

<sup>3</sup> Jiangsu New Horizon Advanced Functional Fiber Innovation Center Co., Ltd., Suzhou 215000, People's Republic of China

# Hualing He and Yi Qin contributed equally to this work.

\*Corresponding authors. E-mail: [yuzhicaicai@163.com](mailto:yuzhicaicai@163.com) (Zhicai Yu)

## **S1 Experimental Section**

### **S1.1 Synthesis of Ag NWs@PDA**

Firstly, 50 mg Ag NWs were dispersed in 90 mL water and then stir magnetically for 10 minutes. Secondly, 0.18 g DA and 760  $\mu$ L NaOH aqueous solution (2 mol/L) were added to the above mixture followed by stirring for 7 h at 60 °C to obtain AgNWs@polydopamine (PDA) spinning dope.

S2 Supplementary Figures and Tables

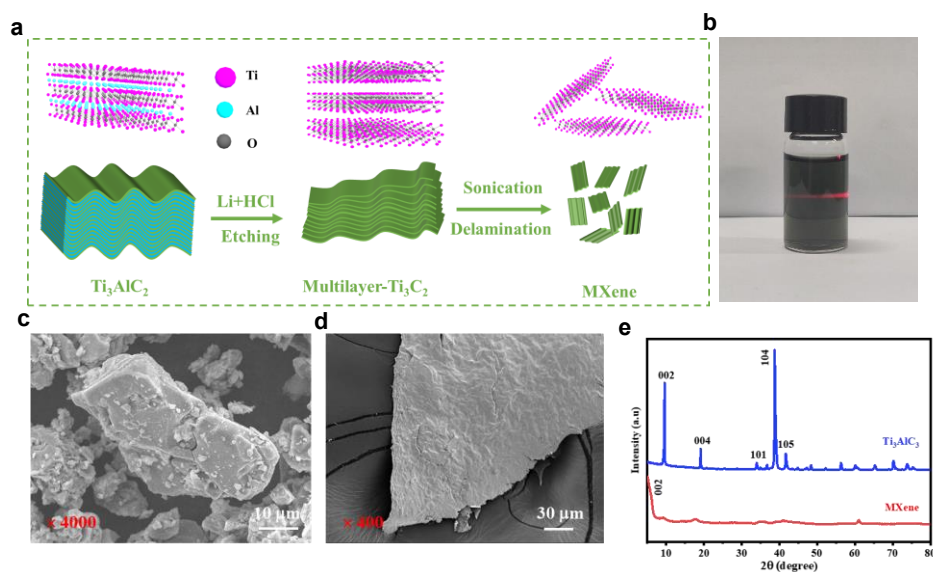

**Fig. S1** a Fabrication schematic illustration of MXene nanosheets. b The digital image of MXene suspension. SEM images of c precursor  $Ti_3AlC_2$  powder and d the MXene nanosheets with different magnifications. e X-ray diffraction patterns of  $Ti_3AlC_2$  powder and MXene nanosheets

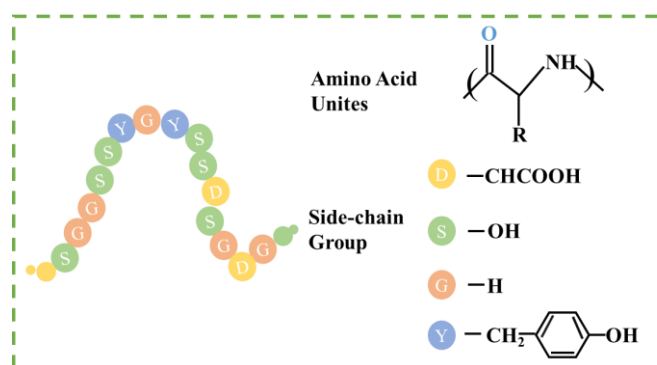

**Fig. S2** Chemical structure of sericin

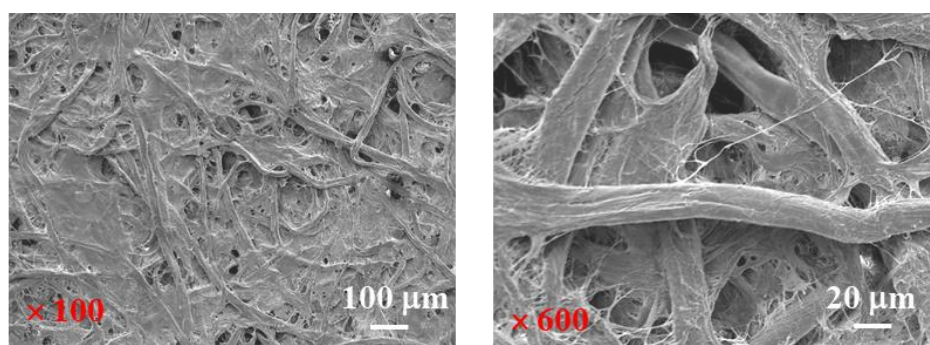

**Fig. S3** SEM images of SWCNT-COOH with different magnifications

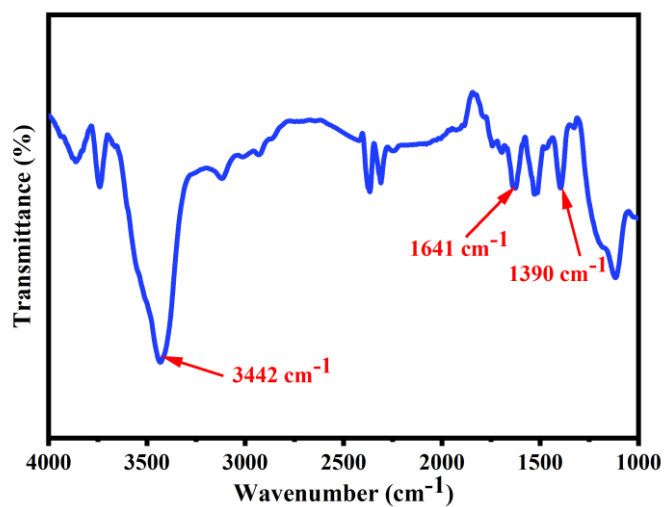

Fig. S4 FTIR spectra of SWCNT-COOH

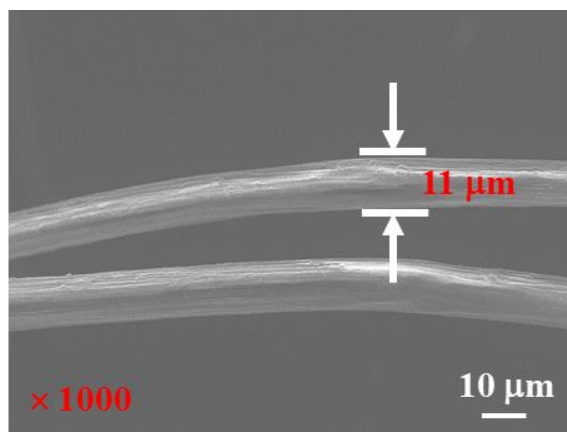

Fig. S5 SEM image of the surface morphology of commercial PPTA

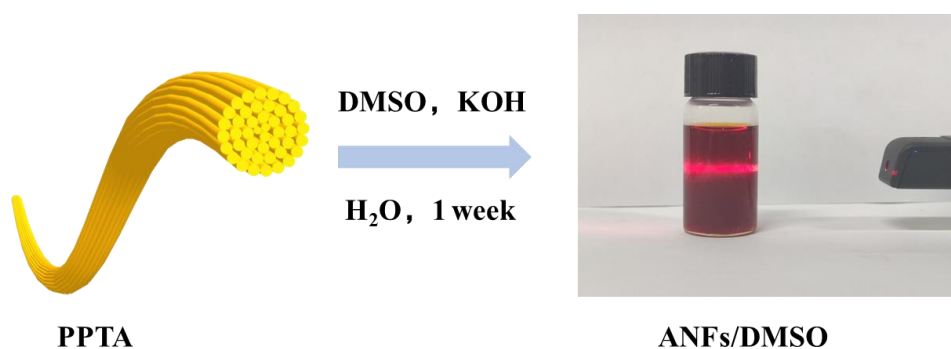

Fig. S6 Preparation process of the ANF dispersion

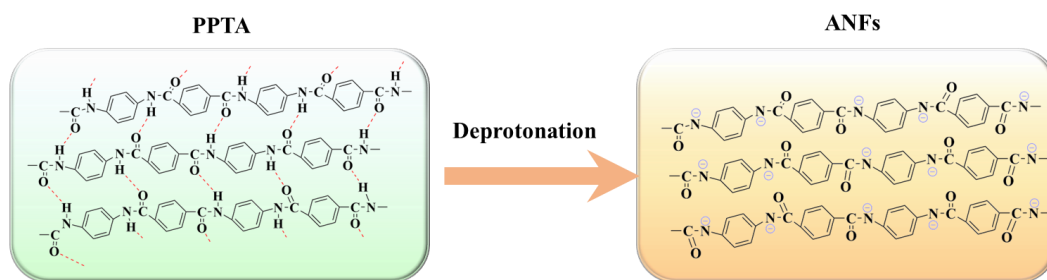

**Fig. S7** Schematic diagram of PPTA fiber formation into ANFs dispersion in KOH/DMSO solution

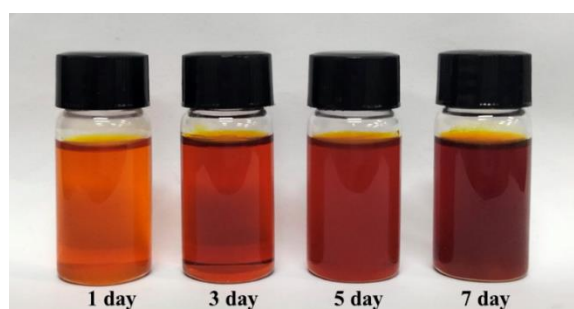

**Fig. S8** Digital photos of ANFs/DMSO solutions at different dissolution times

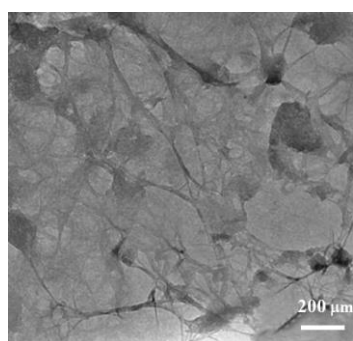

**Fig. S9** TEM image of the as-prepared aramid nanofibers dispersion

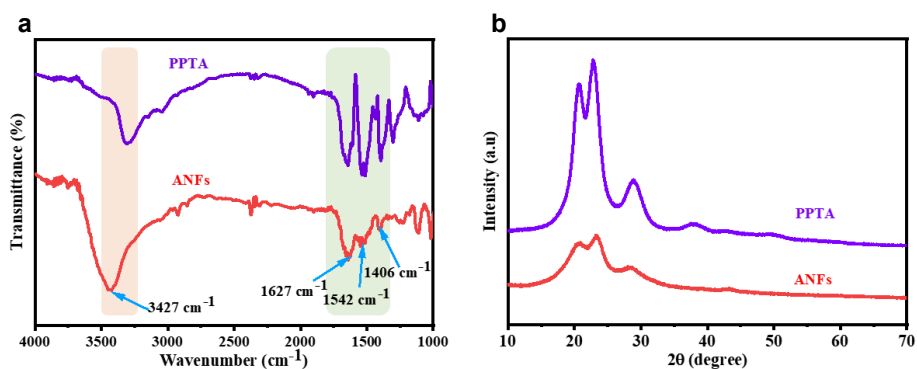

**Fig. S10 a** FTIR spectra and **b** XRD patterns of PPTA fibers before and after dissolution

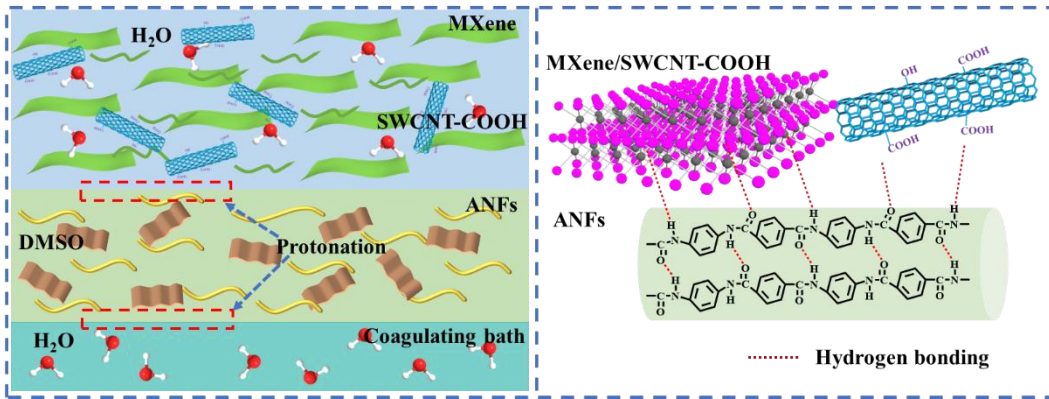

**Fig. S11** Protonation process of ANFs, and the interfacial interactions among SWCNT-COOH, MXene and ANFs

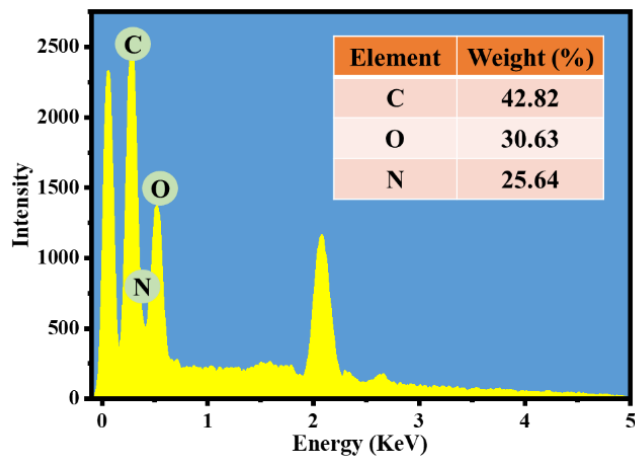

**Fig. S12** EDX elemental mapping of p-n segmented TE fiber

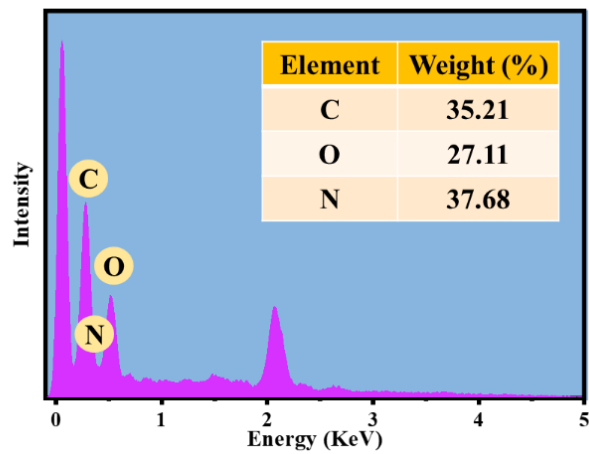

**Fig. S13** EDX elemental mapping of p-n segmented TE fiber after being exposed to flame for 3 s

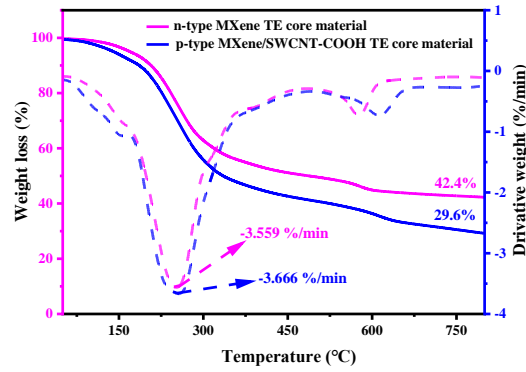

**Fig. S14** TG and DTG curves of n-type MXene and p-type MXene/SWCNT-COOH TE core material in a nitrogen atmosphere

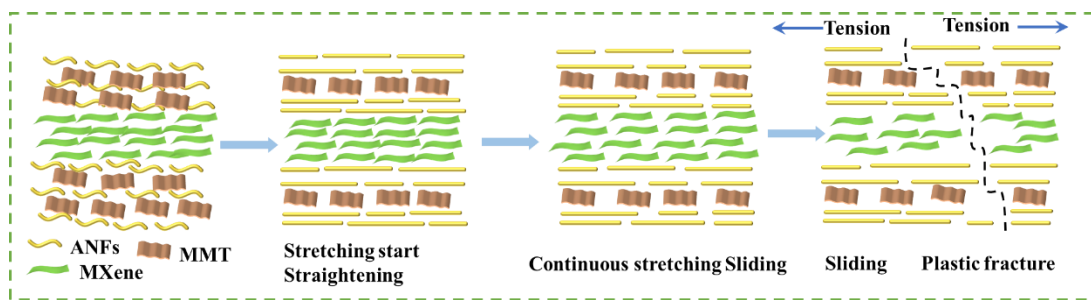

**Fig. S15** Proposed fracture process of p-n segmented core-shell TE fiber

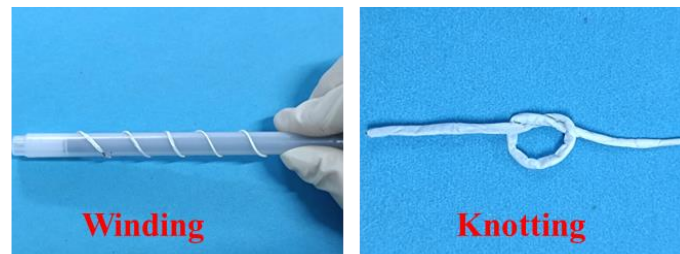

**Fig. S16** Super flexibility of the p-n segmented core-shell TE fiber including winding and bending

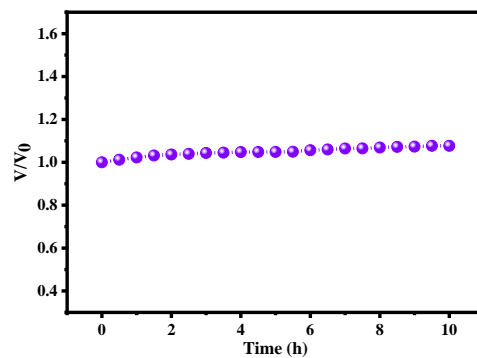

**Fig. S17** The effect of washing times on output voltage of TET (0.5 h for each washing cycle)



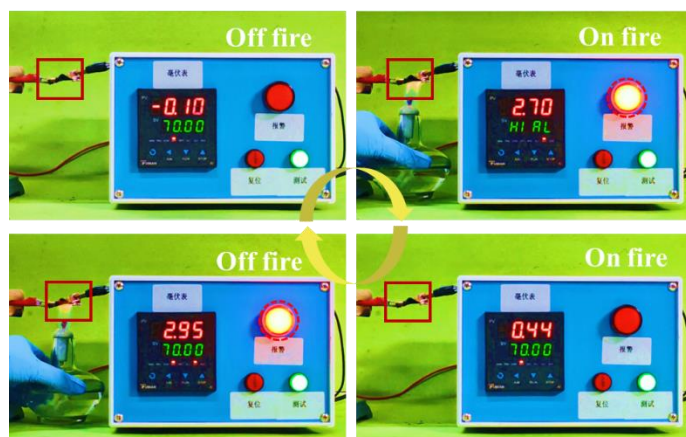

**Fig. S18** TET exhibited rapid and repeated fire warning capability when exposed to flame

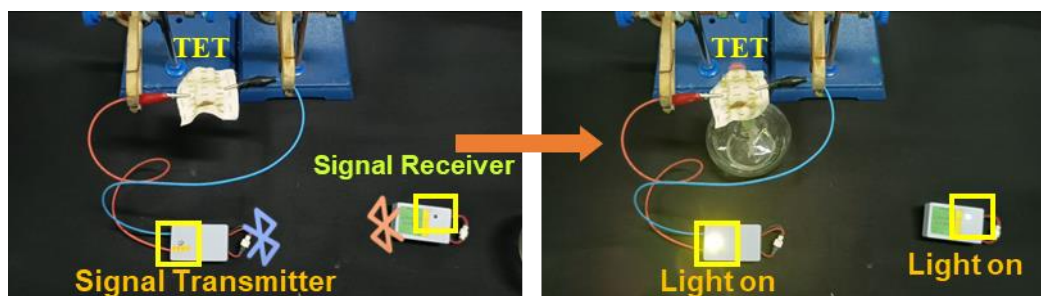

**Fig. S19** Self-powered wireless fire warning test for TET indoors

**Table S1** The standard for dividing the performance of aerogel fiber

| Grade | Tensile strength (MPa) | Conductivity (mS/m) | Diameter (mm) | Knittability | Flexibility | Porosity (%) |
|-------|------------------------|---------------------|---------------|--------------|-------------|--------------|
| 1     | <1                     | <1                  | <0.1          |              |             | < 90         |
| 2     | 1-2                    | 2-8                 | 0.1-0.4       | Unknittable  | Inflexible  | 91-92        |
| 3     | 3-5                    | 8-10                | 0.5-0.8       | Knittable    | flexible    | 93-95        |
| 4     | 6-10                   | 11-15               | 0.9-1         |              |             | 96-98        |
| 5     | >10                    | >15                 | >1            |              |             | > 98         |
